# Supplementary material for: The L-lactate dehydrogenases of Pseudomonas aeruginosa are conditionally regulated but both contribute to survival during macrophage infection
Source: PubMed Central journal article supplement — bioRxiv. 2024 Mar 23:2024.03.21.586142. Preprint. [Version 2] doi: 10.1101/2024.03.21.586142 (PMC10983889; doi:10.1101/2024.03.21.586142), 2024-03-23
Supplement: media-2.pdf [file media-2.pdf]

**Table S1. Bacterial strains used in this study.**

| Number                                       | Strain                                                                                                   | Description                                                                                                                                                                                                                                                                                            | Source     |
|----------------------------------------------|----------------------------------------------------------------------------------------------------------|--------------------------------------------------------------------------------------------------------------------------------------------------------------------------------------------------------------------------------------------------------------------------------------------------------|------------|
| <b><i>Pseudomonas aeruginosa</i> strains</b> |                                                                                                          |                                                                                                                                                                                                                                                                                                        |            |
| LD0                                          | UCBPP-PA14 (WT)                                                                                          | Clinical isolate UCBPP-PA14.                                                                                                                                                                                                                                                                           | (1)        |
| LD2798                                       | PA14 <i>attB</i> ::P <sub><i>lldP</i></sub> - <i>gfp</i>                                                 | PA14 containing a construct in the <i>attB</i> site that expresses <i>gfp</i> under control of the 324 bp region upstream of <i>lldP</i> ( <i>PA14_63080</i> ). Made using pLD2797.                                                                                                                    | (2)        |
| LD2868                                       | PA14 <i>attB</i> ::P <sub><i>lldA</i></sub> - <i>gfp</i>                                                 | PA14 containing a construct in the <i>attB</i> site that expresses <i>gfp</i> under control of the 356 bp region upstream of <i>lldA</i> ( <i>PA14_33860</i> ). Made using pLD2867.                                                                                                                    | (2)        |
| LD4472                                       | PA14 <i>attB</i> ::P <sub><i>lldP</i></sub> - <i>lux</i>                                                 | PA14 containing a construct in the <i>attB</i> site that expresses the <i>luxCDABE</i> operon under control of the 324 bp region upstream of <i>lldP</i> ( <i>PA14_63080</i> ).                                                                                                                        | This study |
| LD4768                                       | PA14 <i>attB</i> ::P <sub><i>lldA</i></sub> - <i>lux</i>                                                 | PA14 containing a construct in the <i>attB</i> site that expresses the <i>luxCDABE</i> operon under control of the 356 bp region upstream of <i>lldA</i> ( <i>PA14_33860</i> ).                                                                                                                        | This study |
| LD4486                                       | PA14 <i>attB</i> ::MCS- <i>lux</i>                                                                       | PA14 containing a construct in the <i>attB</i> site that expresses the <i>luxCDABE</i> operon with no upstream promoter. Made using pLD4440.                                                                                                                                                           | This study |
| LD4157                                       | PA14 <i>attB</i> ::P <sub><i>lldP</i></sub> - <i>mScarlet</i>                                            | PA14 containing a construct in the <i>attB</i> site that expresses <i>mScarlet</i> under control of the 324 bp region upstream of <i>lldP</i> ( <i>PA14_63080</i> ). Made using pLD4111.                                                                                                               | This study |
| LD3760                                       | PA14 <i>attB</i> ::P <sub><i>lldA</i></sub> - <i>mScarlet</i>                                            | PA14 containing a construct in the <i>attB</i> site that expresses <i>mScarlet</i> under control of the 356 bp region upstream of <i>lldA</i> ( <i>PA14_33860</i> ). Made using pLD3738.                                                                                                               | This study |
| LD4189                                       | PA14 <i>attB</i> ::P <sub><i>lldA</i></sub> - <i>mScarlet</i> ,<br>P <sub><i>lldP</i></sub> - <i>gfp</i> | PA14 containing a dual reporter construct in the <i>attB</i> site that expresses <i>mScarlet</i> under control of the 356 bp region upstream of <i>lldA</i> ( <i>PA14_33860</i> ) and <i>gfp</i> under control of the 324 bp region upstream of <i>lldP</i> ( <i>PA14_63080</i> ). Made using pLD4165. | This study |
| LD4187                                       | $\Delta$ <i>lldD</i>                                                                                     | PA14 with <i>lldD</i> ( <i>PA14_63090</i> ) deleted. Made by mating pLD4132 into UCBPP-PA14.                                                                                                                                                                                                           | This study |
| LD4052                                       | $\Delta$ <i>lldA</i>                                                                                     | PA14 with <i>lldA</i> ( <i>PA14_33860</i> ) deleted. Made by mating pLD2758 into UCBPP-PA14.                                                                                                                                                                                                           | (2)        |
| LD3714                                       | $\Delta$ <i>lldS</i>                                                                                     | PA14 with <i>lldS</i> ( <i>PA14_33840</i> ) deleted. Made by mating pLD3690 into UCBPP-PA14.                                                                                                                                                                                                           | This study |
| LD4862                                       | $\Delta$ <i>lldD</i> $\Delta$ <i>lldA</i>                                                                | PA14 with <i>lldD</i> ( <i>PA14_63090</i> ) and <i>lldA</i> ( <i>PA14_33860</i> ) deleted. Made by mating pLD2758 into LD4187.                                                                                                                                                                         | This study |
| LD5130                                       | $\Delta$ <i>lldD</i> $\Delta$ <i>lldS</i>                                                                | PA14 with <i>lldD</i> ( <i>PA14_63090</i> ) and <i>lldS</i> ( <i>PA14_33840</i> )                                                                                                                                                                                                                      | This study |

|        |                                                               |                                                                                                                                                                                                                                                                                |            |
|--------|---------------------------------------------------------------|--------------------------------------------------------------------------------------------------------------------------------------------------------------------------------------------------------------------------------------------------------------------------------|------------|
|        |                                                               | deleted. Made by mating pLD4132 into LD3714.                                                                                                                                                                                                                                   |            |
| LD2735 | $\Delta lldD \Delta lldE$                                     | PA14 with <i>lldD</i> (PA14_63090) and <i>lldE</i> (PA14_63100) deleted. Made by mating pLD2734 into UCBPP-PA14.                                                                                                                                                               | (2)        |
| LD3715 | $\Delta lldS \text{ attB}::P_{lldA}\text{-gfp}$               | $\Delta lldS$ containing a construct in the <i>attB</i> site that expresses <i>gfp</i> under control of the 356 bp region upstream of <i>lldA</i> (PA14_33860). Made by mating pLD3690 into LD2868.                                                                            | This study |
| LD5116 | $\Delta lldS \text{ attB}::P_{lldA}\text{-mScarlet}$          | $\Delta lldS$ containing a construct in the <i>attB</i> site that expresses <i>mScarlet</i> under control of the 356 bp region upstream of <i>lldA</i> (PA14_33860). Made by mating pLD3690 into LD3760.                                                                       | This study |
| LD3809 | $\Delta lldS::lldS$                                           | $\Delta lldS$ (PA14_33840) strain with wild-type <i>lldS</i> complemented back into the site of deletion. Made by mating pLD3797 into LD3714.                                                                                                                                  | This study |
| LD3810 | $\Delta lldS::lldS \text{ attB}::P_{lldA}\text{-gfp}$         | $\Delta lldS$ (PA14_33840) containing a construct in the <i>attB</i> site that expresses <i>gfp</i> under the control of the 356 bp region upstream of <i>lldA</i> with wild-type <i>lldS</i> complemented back into the site of deletion. Made by mating pLD3797 into LD3715. | This study |
| LD5161 | $\Delta lldS::LldS^{T107M}$                                   | T107 of <i>lldS</i> (PA14_33840) mutated to methionine in the native locus. Made by mating pLD5150 into LD3714.                                                                                                                                                                | This study |
| LD5162 | $\Delta lldS::LldS^{T107M} \text{ attB}::P_{lldA}\text{-gfp}$ | T107 of <i>lldS</i> (PA14_33840) mutated to methionine in the native locus. Containing a construct in the <i>attB</i> site that expresses <i>gfp</i> under the control of the 356 bp region upstream of <i>lldA</i> . Made by mating pLD5150 into LD3715.                      | This study |
| LD5169 | $\Delta lldS::LldS^{T107A}$                                   | T107 of <i>lldS</i> (PA14_33840) mutated to alanine in the native locus. Made by mating pLD5173 into LD3714.                                                                                                                                                                   | This study |
| LD5170 | $\Delta lldS::LldS^{T107A} \text{ attB}::P_{lldA}\text{-gfp}$ | T107 of <i>lldS</i> (PA14_33840) mutated to alanine in the native locus. Containing a construct in the <i>attB</i> site that expresses <i>gfp</i> under the control of the 356 bp region upstream of <i>lldA</i> . Made by mating pLD5173 into LD3715.                         | This study |
| LD3508 | $\Delta lldR$                                                 | PA14 with <i>lldR</i> (PA14_63070) deleted. Made by mating pLD3512 into UCBPP-PA14.                                                                                                                                                                                            | This study |
| LD3516 | $\Delta lldR \text{ attB}::P_{lldP}\text{-gfp}$               | $\Delta lldR$ (PA14_63070) containing a construct in the <i>attB</i> site that expresses <i>gfp</i> under control of the 324 bp region upstream of <i>lldP</i> (PA14_63080). Made by mating pLD3512 into LD2798.                                                               | This study |
| LD3510 | $\Delta lldR \text{ attB}::P_{lldA}\text{-gfp}$               | $\Delta lldR$ (PA14_63070) containing a construct in the <i>attB</i> site that expresses <i>gfp</i> under control of the 356 bp region upstream of <i>lldA</i> . Made by mating pLD3512 into                                                                                   | This study |

|        |                                                                                         |                                                                                                                                                                                                                                                                                                               |                        |
|--------|-----------------------------------------------------------------------------------------|---------------------------------------------------------------------------------------------------------------------------------------------------------------------------------------------------------------------------------------------------------------------------------------------------------------|------------------------|
|        |                                                                                         | LD2868.                                                                                                                                                                                                                                                                                                       |                        |
| LD4654 | $\Delta fur2$                                                                           | PA14 with <i>fur2</i> (PA14_33830) deleted. Made by mating pLD4660 into UCBPP-PA14.                                                                                                                                                                                                                           | This study             |
| LD4655 | $\Delta fur2$<br><i>attB::P<sub>lldA</sub>-mScarlet</i>                                 | $\Delta fur2$ containing a construct in the <i>attB</i> site that expresses <i>mScarlet</i> under control of the 356 bp region upstream of <i>lldA</i> (PA14_33860). Made by mating pLD4660 into LD3760.                                                                                                      | This study             |
| LD4394 | $\Delta pvdS$                                                                           | PA14 with <i>pvdS</i> (PA14_33260) deleted.                                                                                                                                                                                                                                                                   | S. Häussler, Helmholtz |
| LD4557 | $\Delta pvdS$<br><i>attB::P<sub>lldA</sub>-mScarlet</i>                                 | $\Delta pvdS$ containing a construct in the <i>attB</i> site that expresses <i>mScarlet</i> under control of the 356 bp region upstream of <i>lldA</i> (PA14_33860). Made by mating pLD3738 into LD4394.                                                                                                      | This study             |
| LD3788 | PA14 <i>attB::P<sub>fur2</sub>-gfp</i>                                                  | PA14 containing a construct in the <i>attB</i> site that expresses <i>gfp</i> under control of the 390 bp region upstream of <i>fur2</i> (PA14_33830). Made using pLD3777.                                                                                                                                    | This study             |
| LD4953 | PA14<br><i>attB::P<sub>glcD</sub>-mScarlet</i>                                          | PA14 containing a construct in the <i>attB</i> site that expresses <i>mScarlet</i> under control of the 494 bp region upstream of <i>glcD</i> (PA14_70690). Made using pLD4757.                                                                                                                               | This study             |
| LD4233 | $\Delta lldD$<br><i>attB::P<sub>lldA</sub>-mScarlet,</i><br><i>P<sub>lldP</sub>-gfp</i> | $\Delta lldD$ containing a dual reporter construct in the <i>attB</i> site that expresses <i>mScarlet</i> under control of the 356 bp region upstream of <i>lldA</i> (PA14_33860) and <i>gfp</i> under control of the 324 bp region upstream of <i>lldP</i> (PA14_63080). Made by mating pLD4132 into LD4189. | This study             |
| LD4235 | $\Delta lldA$<br><i>attB::P<sub>lldA</sub>-mScarlet,</i><br><i>P<sub>lldP</sub>-gfp</i> | $\Delta lldA$ containing a dual reporter construct in the <i>attB</i> site that expresses <i>mScarlet</i> under control of the 356 bp region upstream of <i>lldA</i> (PA14_33860) and <i>gfp</i> under control of the 324 bp region upstream of <i>lldP</i> (PA14_63080). Made by mating pLD2758 into LD4189. | This study             |
| LD5274 | PA14<br><i>attTn7::P<sub>PA1/04/03</sub>-mScarlet</i>                                   | PA14 containing a construct in the attTn7 site that expresses the coding region of <i>mScarlet</i> under control of the lac-derived constitutive PA1/04/03 promoter.                                                                                                                                          | This study             |
| LD4600 | PA14<br><i>attB::P<sub>lldA</sub>(256)-gfp</i>                                          | PA14 containing a construct in the <i>attB</i> site that expresses <i>gfp</i> under control of the 256 bp region upstream of <i>lldA</i> . Made using pLD4600.                                                                                                                                                | This study             |
| LD4980 | PA14<br><i>attB::P<sub>lldA</sub>(221)-gfp</i>                                          | PA14 containing a construct in the <i>attB</i> site that expresses <i>gfp</i> under control of the 221 bp region upstream of <i>lldA</i> . Made using pLD4966.                                                                                                                                                | This study             |
| LD4982 | PA14<br><i>attB::P<sub>lldA</sub>(188)-gfp</i>                                          | PA14 containing a construct in the <i>attB</i> site that expresses <i>gfp</i> under control of the 188 bp region upstream of <i>lldA</i> . Made using pLD4967.                                                                                                                                                | This study             |

|                                                |                                                |                                                                                                                                                                                                                                                                                 |                                             |
|------------------------------------------------|------------------------------------------------|---------------------------------------------------------------------------------------------------------------------------------------------------------------------------------------------------------------------------------------------------------------------------------|---------------------------------------------|
| LD5027                                         | PA14<br><i>attB::P<sub>lldA</sub>(164)-gfp</i> | PA14 containing a construct in the <i>attB</i> site that expresses <i>gfp</i> under control of the 164 bp region upstream of <i>lldA</i> . Made using pLD5029.                                                                                                                  | This study                                  |
| LD4599                                         | PA14<br><i>attB::P<sub>lldA</sub>(125)-gfp</i> | PA14 containing a construct in the <i>attB</i> site that expresses <i>gfp</i> under control of the 125 bp region upstream of <i>lldA</i> . Made using pLD4599.                                                                                                                  | This study                                  |
| LD4598                                         | PA14<br><i>attB::P<sub>lldA</sub>(105)-gfp</i> | PA14 containing a construct in the <i>attB</i> site that expresses <i>gfp</i> under control of the 105 bp region upstream of <i>lldA</i> . Made using pLD4598.                                                                                                                  | This study                                  |
| <b><i>E. coli</i> strains</b>                  |                                                |                                                                                                                                                                                                                                                                                 |                                             |
| LD44                                           | UQ950 <i>E. coli</i>                           | DH5α λ( <i>pir</i> ) strain for cloning;<br>F-Δ( <i>argF-lac</i> )169Φ80Δ <i>lacZ</i> 58 (ΔM15) <i>glnV44</i> (AS)<br><i>rfdD1 gyrA96</i> (NalR) <i>recA1 endA1 spoT thi-1 hsdR17</i><br><i>deoR λpir+</i> D                                                                    | D. Lies,<br>Caltech                         |
| LD661                                          | BW29427                                        | Donor strain for conjugation: <i>thrB1004 pro thi rpsL</i><br><i>hsdS lacZ</i> ΔM15RP4–1360 Δ( <i>araBAD</i> )567<br>Δ <i>dapA1341</i> ::[ <i>erm pir</i> (wt)]                                                                                                                 | W.<br>Metcalf,<br>University<br>of Illinois |
| LD69                                           | β2155                                          | Helper strain. <i>thrB1004 pro thi strA hsdS lacZ</i> ΔM15<br>(F' <i>lacZ</i> ΔM15 <i>lacI</i> <sup>q</sup> <i>traD36 proA</i> <sup>+</sup> <i>proB</i> <sup>+</sup> ) Δ <i>dapA</i> :: <i>erm</i><br>(Erm <sup>R</sup> ) <i>pir</i> ::RP4 [::kan (Km <sup>R</sup> ) from SM10] | (3)                                         |
| LD2901                                         | S17-1                                          | Str <sup>R</sup> , Tp <sup>R</sup> , F-RP4-2- <i>Tc::Mu aphA::Tn7 recA λpir</i><br>lysogen                                                                                                                                                                                      | (4)                                         |
|                                                | BL21 (DE3)                                     | Competent <i>E. coli</i> strain used for protein purification.                                                                                                                                                                                                                  | New<br>England<br>BioLabs                   |
| <b><i>Saccharomyces cerevisiae</i> strains</b> |                                                |                                                                                                                                                                                                                                                                                 |                                             |
| LD676                                          | InvSc1                                         | <i>MATα/MATα leu2/leu2 trp1-289/trp1-289</i><br><i>ura3-52/ura3-52 his3-Δ1/his3-Δ1</i>                                                                                                                                                                                          | Invitrogen                                  |

**Table S2. Plasmids used in this study.**

| Plasmid name | Description                                                                                                                                                                                                   | Source     |
|--------------|---------------------------------------------------------------------------------------------------------------------------------------------------------------------------------------------------------------|------------|
| pMQ30        | Yeast-based allelic-exchange vector; <i>sacB</i> <sup>+</sup> , CEN/ARSH, URA3 <sup>+</sup> , Gm <sup>R</sup> .                                                                                               | (5)        |
| pFLP2        | Site-specific excision vector with cl857-controlled FLP recombinase. encoding sequence, <i>sacB</i> <sup>+</sup> , Amp <sup>R</sup> . Used to insert LD2722-based plasmids into <i>P. aeruginosa</i> strains. | (6)        |
| pLD2722      | mini-CTX derived plasmid. Gm <sup>R</sup> , Tet <sup>R</sup> flanked by Flp recombinase target (FRT) sites to resolve out resistance cassettes. For making GFP reporters.                                     | (7)        |
| pLD3208      | mini-CTX derived plasmid. Gm <sup>R</sup> , Tet <sup>R</sup> flanked by Flp recombinase target (FRT) sites to resolve out resistance cassettes. For making mScarlet reporters.                                | (8)        |
| pLD4440      | pMINI-lux, a mini-CTX derivative containing promoterless <i>luxCDABE</i> operon, Tet <sup>R</sup>                                                                                                             | (9)        |
| pLD3433      | mini-Tn7 derived plasmid. Gm <sup>R</sup> , Cm <sup>R</sup> P <sub>PA1/04/03</sub> :: <i>mScarlet</i>                                                                                                         | (10)       |
| pLD2797      | 324 bp upstream of <i>lldP</i> PCR fragment in pLD2722.                                                                                                                                                       | (2)        |
| pLD2867      | 356 bp upstream of <i>lldA</i> PCR fragment in pLD2722.                                                                                                                                                       | (2)        |
| pLD4111      | 800 bp <i>mScarlet-terminator</i> PCR fragment ligated into pLD2797 using SacI and XhoI.                                                                                                                      | This study |
| pLD3738      | 800 bp <i>mScarlet-terminator</i> PCR fragment ligated into pLD2867 using SacI and XhoI.                                                                                                                      | This study |
| pLD4441      | 324 bp upstream of <i>lldP</i> PCR fragment ligated into pLD4440 using XhoI and EcoRI.                                                                                                                        | This study |
| pLD4769      | 356 bp upstream of <i>lldA</i> PCR fragment ligated into pLD4440 using XhoI and EcoRI.                                                                                                                        | This study |
| pLD4165      | 2943 bp PCR fragment amplified from pLD3738 containing the 356 bp <i>lldA</i> promoter and <i>mScarlet-terminator</i> sequence ligated into pLD2797 using SpeI and BamHI.                                     | This study |
| pLD3777      | 390 bp upstream of <i>fur2</i> (PA14_33830) PCR fragment ligated into pLD2797 using XhoI.                                                                                                                     | This study |
| pLD4757      | 494 bp upstream of <i>glcD</i> (PA14_70690) PCR fragment ligated into pLD3208 using SpeI and EcoRI.                                                                                                           | This study |
| pLD4600      | 256 bp upstream of <i>lldA</i> (PA14_33860) PCR fragment ligated into pLD2722 using SpeI and XhoI.                                                                                                            | This study |
| pLD4966      | 221 bp upstream of <i>lldA</i> (PA14_33860) PCR fragment ligated into pLD2722 using SpeI and XhoI.                                                                                                            | This study |

|             |                                                                                                                                                                  |            |
|-------------|------------------------------------------------------------------------------------------------------------------------------------------------------------------|------------|
| pLD4967     | 188 bp upstream of <i>IldA</i> (PA14_33860) PCR fragment ligated into pLD2722 using SpeI and XhoI.                                                               | This study |
| pLD5029     | 164 bp upstream of <i>IldA</i> (PA14_33860) PCR fragment ligated into pLD2722 using SpeI and XhoI.                                                               | This study |
| pLD4599     | 125 bp upstream of <i>IldA</i> (PA14_33860) PCR fragment ligated into pLD2722 using SpeI and XhoI.                                                               | This study |
| pLD4598     | 105 bp upstream of <i>IldA</i> (PA14_33860) PCR fragment ligated into pLD2722 using SpeI and XhoI.                                                               | This study |
| pLD2758     | $\Delta IldA$ (PA14_33860) flanking fragments introduced into pMQ30 by gap repair cloning in yeast strain InvSc1.                                                | (2)        |
| pLD2734     | $\Delta IldDE$ (PA14_63090-63100) flanking fragments introduced into pMQ30 by gap repair cloning in yeast strain InvSc1.                                         | (2)        |
| pLD4132     | $\Delta IldD$ (PA14_63090) flanking fragments introduced into pMQ30 by gap repair cloning in yeast strain InvSc1.                                                | This study |
| pLD3690     | $\Delta IldS$ (PA14_33840) flanking fragments introduced into pMQ30 by gap repair cloning in yeast strain InvSc1.                                                | This study |
| pLD4660     | $\Delta fur2$ (PA14_33830) flanking fragments introduced into pMQ30 by gap repair cloning in yeast strain InvSc1.                                                | This study |
| pLD3512     | $\Delta IldR$ (PA14_63070) flanking fragments introduced into pMQ30 by gap repair cloning in yeast strain InvSc1.                                                | This study |
| pLD3797     | The CDS of <i>IldS</i> with ~1 kb flanks on either side, introduced into pMQ30 by gap repair cloning in yeast strain InvSc1.                                     | This study |
| pLD5150     | The CDS of <i>IldS</i> with ~1 kb flanks on either side with T107 changed to an methionine, introduced into pMQ30 by gap repair cloning in yeast strain InvSc-1. | This study |
| pLD5173     | The CDS of <i>IldS</i> with ~1 kb flanks on either side with T107 changed to an alanine, introduced into pMQ30 by gap repair cloning in yeast strain InvSc-1.    | This study |
| pET28a      | Expression plasmid used for protein purification. Contains a T7 promoter, 6x-His tag. Kan <sup>R</sup>                                                           | Addgene    |
| pET28a-IldS | Expression plasmid containing a T7 promoter in front of the <i>IldS</i> sequence. Contains an N-termin 6x-His tag. Kan <sup>R</sup>                              | This study |

**Table S3. Primers used in this study.**

| Primer Number                                                                                                     | Sequence                                                       |
|-------------------------------------------------------------------------------------------------------------------|----------------------------------------------------------------|
| Primers for plasmids pLD4111, pLD3738 (used to make $P_{lldP}$ - <i>mScarlet</i> , $P_{lldA}$ - <i>mScarlet</i> ) |                                                                |
| 2609                                                                                                              | acgtacgt ctcgag tctagatttaaga aggaga tatacat ATGAGTAAAGGAGAAGC |
| 2635                                                                                                              | actgactg gagctc ATAAAACGAAAGGCCAGTCTTTTCG                      |
| Primers for plasmid pLD4441 (used to make $P_{lldP}$ - <i>lux</i> )                                               |                                                                |
| 3895                                                                                                              | tatctcaggctCGACACCCTTACCCGAAGTT                                |
| 3896                                                                                                              | tatgaattcgttGGGTTGGCTCCCTAATTGTTG                              |
| Primers for plasmid pLD4769 (used to make $P_{lldA}$ - <i>lux</i> )                                               |                                                                |
| 4121                                                                                                              | tatctcaggctTGCTCGATTTGGGCATGAC                                 |
| 4122                                                                                                              | tatgaattcgttGCAGTCCACTCCTTCGGG                                 |
| Primers for plasmid pLD4165 (used to make dual reporter $P_{lldP}$ - <i>gfp</i> , $P_{lldA}$ - <i>mScarlet</i> )  |                                                                |
| 3781                                                                                                              | catagactagtctatgcgcggtcgatgcgatgtagcTGCTCGATTTGGGCATGACC       |
| 3783                                                                                                              | catataggatccatcgtccgacgAAGATCCCCTGATTCCCTTTGT                  |
| Primers for plasmid pLD3777 (used to make $P_{fur2}$ - <i>gfp</i> )                                               |                                                                |
| 3269                                                                                                              | ccccgggctgcaggaattccGGCACCAGCTACATCCAAC                        |
| 3270                                                                                                              | ttgtaccgggccaagcttcCGTGACGCTCCTTTTCGTG                         |
| Primers for plasmid pLD4757 (used to make $P_{glcD}$ - <i>mScarlet</i> )                                          |                                                                |
| 4449                                                                                                              | acgtacgtacactagtTCGAGCAGGTCGTAGAGGGT                           |
| 4450                                                                                                              | acgtacgtacgaattcGGCGGCTGTCCTTGTGTTGTG                          |
| Primers for plasmid pLD4132 ( $\Delta lldD$ )                                                                     |                                                                |
| 3710                                                                                                              | aggcaaattctgtttatcagaccgcttctcgttctgatAAACCTTTCAAGGCCCTGTT     |
| 3711                                                                                                              | ttcgatcagttcgcagcaggttCAGGGTGTACTCGGCGTA                       |
| 3712                                                                                                              | tacgccgagtacaccctgAACCTGCTCGAACTGATCGAA                        |
| 3713                                                                                                              | ggaattgtgagcggataacaattcacacaggaacagctATCAGGTGGGTGAGGATGTC     |
| Primers for plasmid pLD3690 ( $\Delta lldS$ )                                                                     |                                                                |
| 2986                                                                                                              | aggcaaattctgtttatcagaccgcttctcgttctgatCAGGAACGCATCGCGATTCC     |

|                                                                            |                                                             |
|----------------------------------------------------------------------------|-------------------------------------------------------------|
| 3198                                                                       | tcatgccc aaatcgagcagGCTGCCGGTGATCGACAGG                     |
| 3199                                                                       | cctgtcgatcaccggcagcCTGCTCGATTTGGGCATGA                      |
| 2989                                                                       | ggaattgtgagcggataacaatttcacacaggaacagctCAGCGGGCGCTTGATCCATT |
| Primers for plasmid pLD3797 ( <i>lIdS</i> complementation)                 |                                                             |
| 2986                                                                       | aggcaaattctgtttatcagaccgcttctgcttctgatCAGGAACGCATCGCGATTCC  |
| 2989                                                                       | ggaattgtgagcggataacaatttcacacaggaacagctCAGCGGGCGCTTGATCCATT |
| Primers for plasmid pLD5150 ( <i>LIdS</i> <sup>T107M</sup> point mutation) |                                                             |
| 4569                                                                       | ccaggcaaattctgtttatcagaccgcttctgcttctgatCGCGGGTTGCTGGCTT    |
| 4570                                                                       | gcggaatcaggatctgccgggagAACATCGGCGGCGTG                      |
| 4571                                                                       | cctgcgcacgcccgatgttCGCCCGGCAGATCCTGAT                       |
| 4572                                                                       | aattgtgagcggataacaatttcacacaggaacagctCCGTGGCGATGTCCTCCA     |
| Primers for plasmid pLD5173 ( <i>LIdS</i> <sup>T107A</sup> point mutation) |                                                             |
| 4569                                                                       | ccaggcaaattctgtttatcagaccgcttctgcttctgatCGCGGGTTGCTGGCTT    |
| 4566                                                                       | cgcggaatcaggatctgccgggagAAGGCCGGCGGCGTG                     |
| 4567                                                                       | cctgcgcacgcccgcccttCGCCCGGCAGATCCTGAT                       |
| 4568                                                                       | aattgtgagcggataacaatttcacacaggaacagctGGCCATCTCCTGGCCGAG     |
| Primers for plasmid pLD3512 ( $\Delta$ <i>lIdR</i> )                       |                                                             |
| 2877                                                                       | caggcaaattctgtttatcagaccgcttctgcttctgatATGGCGCCGATCTTGAAGG  |
| 2878                                                                       | ggatgtgctggttgacaccCCTCCAGTTGCGCAACGATG                     |
| 2879                                                                       | catcgttgcgaactggaggGGTGTCCAACCAGCACATCC                     |
| 2880                                                                       | ggaattgtgagcggataacaatttcacacaggaacagctCAGGAACTCCGGATAGCGCT |
| Primers for plasmid pLD4660 ( $\Delta$ <i>fur2</i> )                       |                                                             |
| 4109                                                                       | ggcaaattctgtttatcagaccgcttctgcttctgatAAGTCCCTTGCCCGCG       |
| 4110                                                                       | ctgctcgttgccgcgaGGCCGGCCTCCTTCAA                            |
| 4111                                                                       | ttgaaggaggccgcctCGCGGCCAACGAGCAG                            |
| 4112                                                                       | aattgtgagcggataacaatttcacacaggaacagctTGGCGGGCGCTTCCAG       |
| Primers for pLD4600 ( <i>P</i> <sub><i>lIdA</i></sub> (256)- <i>gfp</i> )  |                                                             |
| 4117                                                                       | acgtacctcgagGCAGTCCACTCCTTCGGG                              |



|                                                          |                                |
|----------------------------------------------------------|--------------------------------|
| 4120                                                     | acgtacactagtGGTGGTGCTGTTCCCGC  |
| Primers for pLD4966 ( <i>P<sub>lIdA</sub>(221)-gfp</i> ) |                                |
| 4117                                                     | acgtacctcgagGCAGTCCACTCCTTCGGG |
| 4486                                                     | acgtacactagtACCATTACCACCTGCGCA |
| Primers for pLD4967 ( <i>P<sub>lIdA</sub>(188)-gfp</i> ) |                                |
| 4117                                                     | acgtacctcgagGCAGTCCACTCCTTCGGG |
| 4487                                                     | acgtacactagtCGGCCAGCCAGCGTTT   |
| Primers for pLD5029 ( <i>P<sub>lIdA</sub>(164)-gfp</i> ) |                                |
| 4117                                                     | acgtacctcgagGCAGTCCACTCCTTCGGG |
| 4488                                                     | acgtacactagtGGCTGGCGGCGATCT    |
| Primers for pLD4599 ( <i>P<sub>lIdA</sub>(125)-gfp</i> ) |                                |
| 4117                                                     | acgtacctcgagGCAGTCCACTCCTTCGGG |
| 4118                                                     | acgtacactagtGGGAATTCCTTCGGCGG  |
| Primers for pLD4598 ( <i>P<sub>lIdA</sub>(105)-gfp</i> ) |                                |
| 4117                                                     | acgtacctcgagGCAGTCCACTCCTTCGGG |
| 4119                                                     | acgtacactagtGACGACTGAAACGGCGGA |
| Primers for pET28a-lIdS                                  |                                |
| lIdS-F                                                   | aaaacatatgctcaatcccgacgatttc   |
| lIdS-R                                                   | aaaagtcgactcagtcgtccgcc        |

### Supplemental References

1. Rahme LG, Stevens EJ, Wolfort SF, Shao J, Tompkins RG, Ausubel FM. 1995. Common virulence factors for bacterial pathogenicity in plants and animals. *Science* 268:1899–1902.
2. Lin Y-C, Cornell WC, Jo J, Price-Whelan A, Dietrich LEP. 2018. The *Pseudomonas aeruginosa* Complement of Lactate Dehydrogenases Enables Use of d- and l-Lactate and Metabolic Cross-Feeding. *MBio* 9.

3. Dehio C, Meyer M. 1997. Maintenance of broad-host-range incompatibility group P and group Q plasmids and transposition of Tn5 in *Bartonella henselae* following conjugal plasmid transfer from *Escherichia coli*. *J Bacteriol* 179:538–540.
4. Simon R, Priefer U, Pühler A. 1983. A Broad Host Range Mobilization System for In Vivo Genetic Engineering: Transposon Mutagenesis in Gram Negative Bacteria. *Biotechnology* 1:784–791.
5. Shanks RMQ, Caiazza NC, Hinsa SM, Toutain CM, O'Toole GA. 2006. *Saccharomyces cerevisiae*-based molecular tool kit for manipulation of genes from gram-negative bacteria. *Appl Environ Microbiol* 72:5027–5036.
6. Hoang TT, Karkhoff-Schweizer RR, Kutchma AJ, Schweizer HP. 1998. A broad-host-range Flp-FRT recombination system for site-specific excision of chromosomally-located DNA sequences: application for isolation of unmarked *Pseudomonas aeruginosa* mutants. *Gene* 212:77–86.
7. Jo J, Cortez KL, Cornell WC, Price-Whelan A, Dietrich LEP. 2017. An orphan cbb3-type cytochrome oxidase subunit supports *Pseudomonas aeruginosa* biofilm growth and virulence. *Elife* 6:e30205.
8. Okegbe C, Fields BL, Cole SJ, Beierschmitt C, Morgan CJ, Price-Whelan A, Stewart RC, Lee VT, Dietrich LEP. 2017. Electron-shuttling antibiotics structure bacterial communities by modulating cellular levels of c-di-GMP. *Proc Natl Acad Sci U S A* 114:E5236–E5245.
9. Higgins S, Heeb S, Rampioni G, Fletcher MP, Williams P, Cámara M. 2018. Differential Regulation of the Phenazine Biosynthetic Operons by Quorum Sensing in *Pseudomonas aeruginosa* PAO1-N. *Front Cell Infect Microbiol* 8:252.
10. Dayton H, Kiss J, Wei M, Chauhan S, LaMarre E, Cornell WC, Morgan CJ, Janakiraman A, Min W, Tomer R, Price-Whelan A, Nirody JA, Dietrich LEP. 2024. Cellular arrangement impacts metabolic activity and antibiotic tolerance in *Pseudomonas aeruginosa* biofilms. *PLoS Biol* 22:e3002205.
