# Supplementary material for: The L-lactate dehydrogenases of Pseudomonas aeruginosa are conditionally regulated but both contribute to survival during macrophage infection
Source: PubMed Central journal article supplement — bioRxiv. 2024 Mar 23:2024.03.21.586142. Preprint. [Version 2] doi: 10.1101/2024.03.21.586142 (PMC10983889; doi:10.1101/2024.03.21.586142), 2024-03-23

**Supplemental File 1.** Pseudomonad L-iLDH profiles. Left: Phylogram representing the relationships between LIdD and LIdA proteins produced by each of the indicated strains. Center and right: L-iLDH profiles of each of the listed strains. Color shading corresponds to the genomic arrangements shown in the key at the top and in Figure 4A.

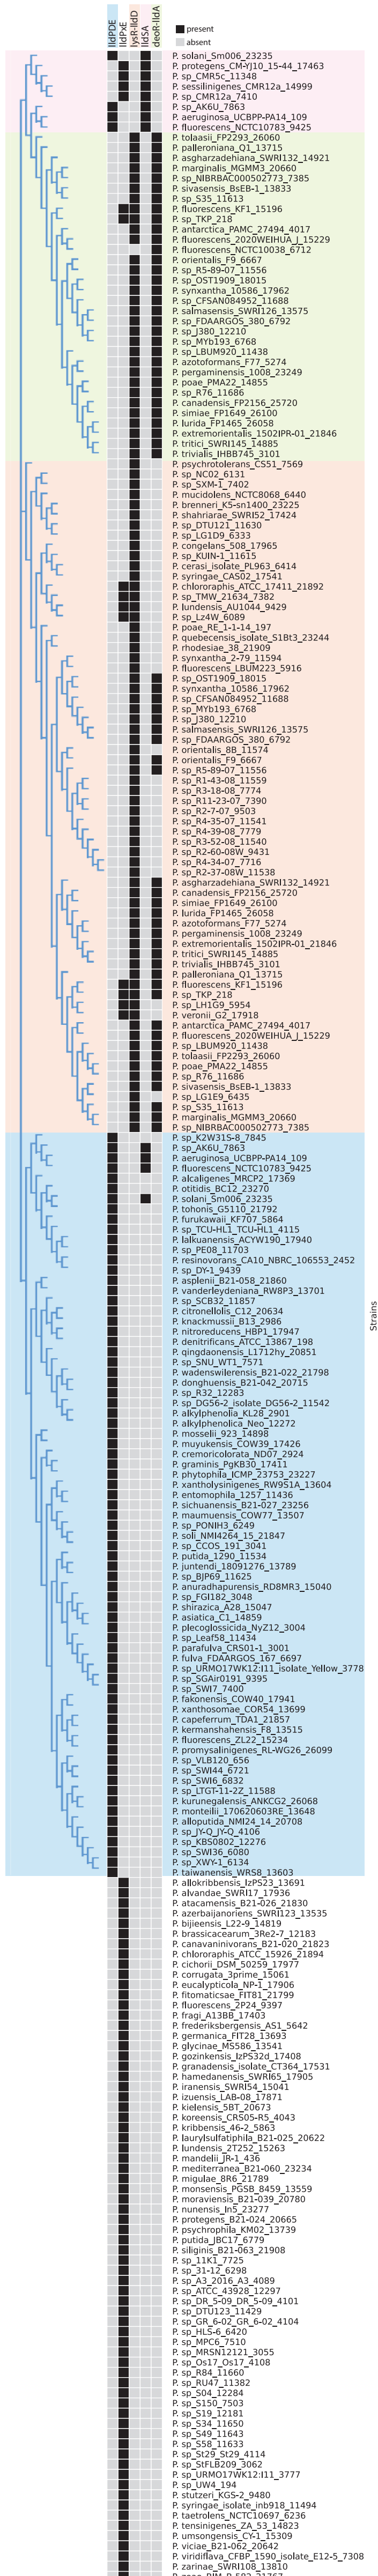

Supplement: media-3.pdf [file media-3.pdf]
